# Supplementary material
Source: PubMed Central journal article supplement (PMC9371452)
Supplement: gbac026_suppl_supplementary_figures.pdf [file gbac026_suppl_supplementary_figures.pdf]

**Supplemental Table S1. Examples of included and excluded birth years in our sample**

Selected examples of respondents who would be included or excluded from our sample based on birth year, years of school attendance, and our inclusion criteria that respondents began primary school in or after 1919 and completed primary/secondary schooling by 1954.

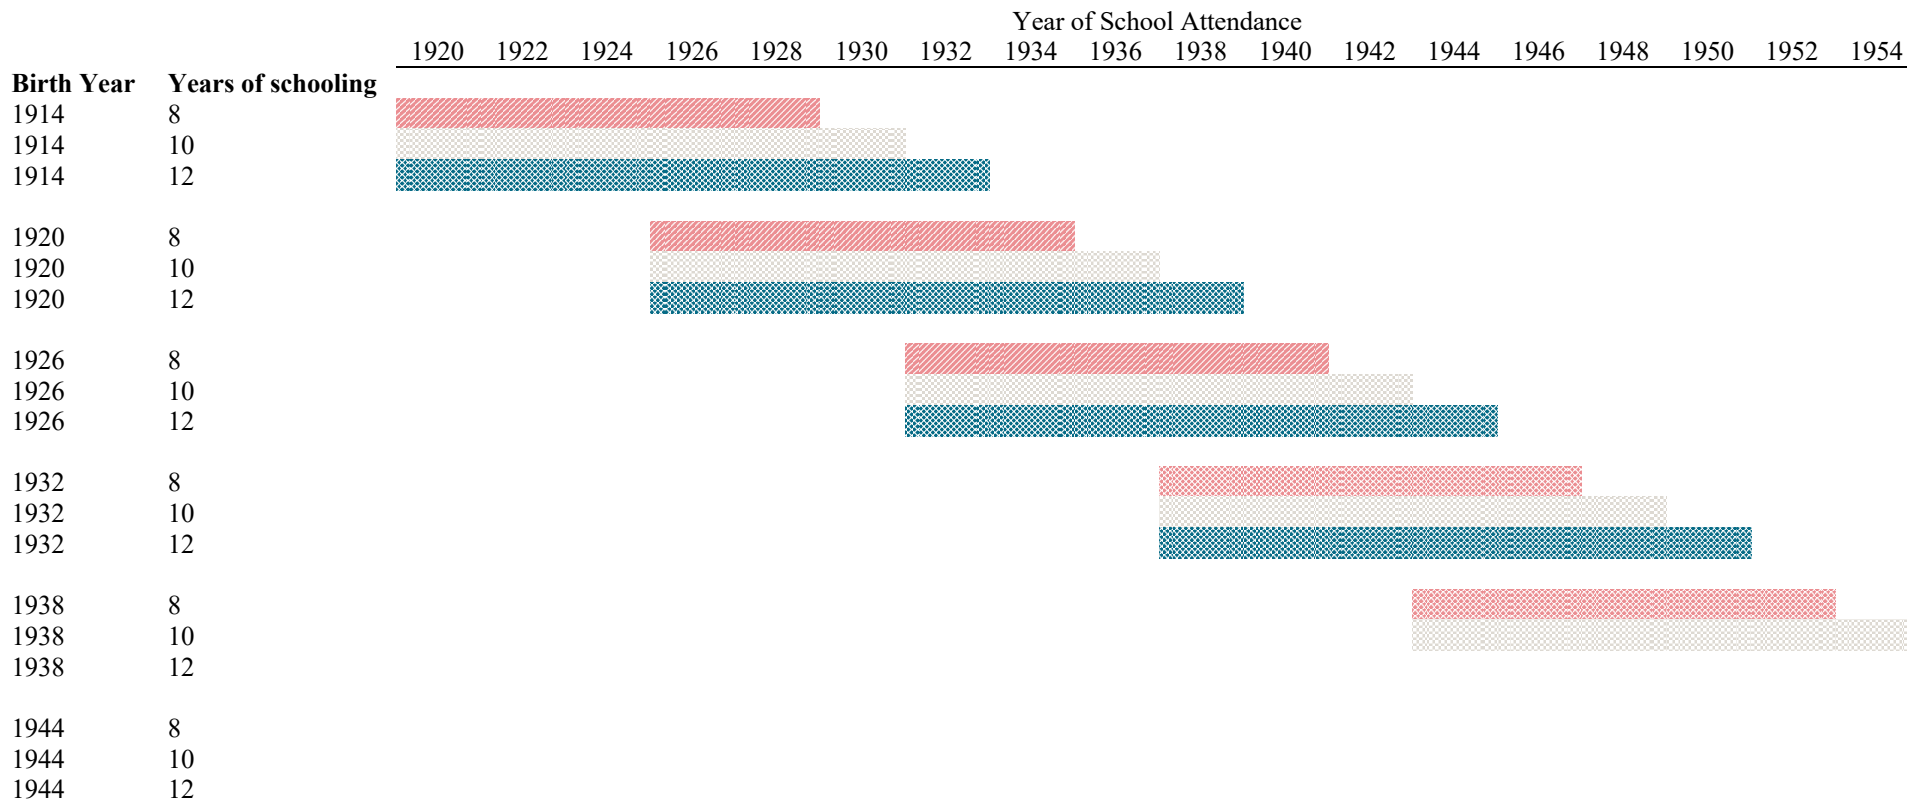

*Notes:* Shaded years are the years that we assume respondents were attending school based on their birth year and self-reported years of schooling attended. We assumed that respondents began primary school at age 6. To be included in the sample, respondents would need to have BSE data on school attendance for all years they were in school. Thus, respondents born in 1938 who reported 8 years of schooling would be included in our sample, but respondents born in 1944 who completed 8 years of schooling would not because the BSE data is only available through 1954 and respondents born in 1944 who completed 8 years of schooling would need BSE data through 1958.

**Supplemental Table S2. Estimates from models using non-top coded education measures**

Estimates from linear mixed models predicting cognitive functioning, episodic memory, and working memory among Black and White older adults who resided in U.S. South during school using education measures that included post-secondary years, Health and Retirement Study (n=4,343)

|                              | <b>Model 1</b> |            | <b>Model 2</b> |            | <b>Model 3</b> |            |
|------------------------------|----------------|------------|----------------|------------|----------------|------------|
|                              | <b>At 73</b>   | <b>Age</b> | <b>At 73</b>   | <b>Age</b> | <b>At 73</b>   | <b>Age</b> |
| <b>Cognitive Functioning</b> |                |            |                |            |                |            |
| Black                        | -3.44*         | 0.11       | -2.37*         | 0.05       | -1.97*         | 0.02       |
|                              | (0.15)         | (0.11)     | (0.13)         | (0.11)     | (0.14)         | (0.12)     |
| Years of schooling           |                |            | 0.51*          | -0.08*     |                |            |
|                              |                |            | (0.03)         | (0.03)     |                |            |
| Duration in school           |                |            |                |            | 0.60*          | -0.07      |
|                              |                |            |                |            | (0.04)         | (0.04)     |
| Constant                     | 12.44*         | -1.27*     | 13.82*         | -1.73*     | 15.27*         | -1.84*     |
|                              | (0.26)         | (0.20)     | (0.23)         | (0.21)     | (0.25)         | (0.23)     |
| <b>Episodic Memory</b>       |                |            |                |            |                |            |
| Black                        | -1.79*         | 0.26*      | -1.20*         | 0.17       | -0.98*         | 0.14       |
|                              | (0.10)         | (0.09)     | (0.10)         | (0.09)     | (0.10)         | (0.10)     |
| Years of schooling           |                |            | 0.28*          | -0.06*     |                |            |
|                              |                |            | (0.02)         | (0.02)     |                |            |
| Duration in school           |                |            |                |            | 0.33*          | -0.06      |
|                              |                |            |                |            | (0.03)         | (0.03)     |
| Constant                     | 7.75*          | -1.16*     | 8.48*          | -1.53*     | 9.29*          | -1.65*     |
|                              | (0.18)         | (0.16)     | (0.18)         | (0.17)     | (0.19)         | (0.18)     |
| <b>Working Memory</b>        |                |            |                |            |                |            |
| Black                        | -1.64*         | -0.16*     | -1.17*         | -0.13*     | -0.99*         | -0.12*     |
|                              | (0.07)         | (0.05)     | (0.06)         | (0.05)     | (0.06)         | (0.05)     |
| Years of schooling           |                |            | 0.23*          | -0.01      |                |            |
|                              |                |            | (0.01)         | (0.01)     |                |            |
| Duration in school           |                |            |                |            | 0.26*          | -0.01      |
|                              |                |            |                |            | (0.02)         | (0.01)     |
| Constant                     | 4.76*          | -0.04      | 5.38*          | -0.17*     | 6.01*          | -0.17      |
|                              | (0.11)         | (0.08)     | (0.10)         | (0.08)     | (0.11)         | (0.09)     |

\* $p < 0.05$

**Supplemental Table S3. Selected examples of duration in school formula using BSE data.**

Estimates for calculating the duration in school measure using as examples hypothetical White or Black students born in 1914, who lived in Alabama or Maryland, and completed 8, 10, or 12 years of schooling. Estimates derived solely using BSE data.

| $s$      | $r$            | $t$                   | $c_i$                            | $\Sigma b_{rst}$    | $\Sigma z_t$                                      | $x_i$              |
|----------|----------------|-----------------------|----------------------------------|---------------------|---------------------------------------------------|--------------------|
| State    | Student's race | Years attended school | Self-reported years of schooling | Total days attended | Total days of school based on maximum term length | Duration in school |
| Alabama  | White          | 1920-1928             | 8                                | 914.5               | 1676                                              | 4.4 years          |
|          | Black          | 1920-1928             | 8                                | 720.5               | 1676                                              | 3.4 years          |
|          | White          | 1920-1930             | 10                               | 1155.5              | 2052.5                                            | 5.6 years          |
|          | Black          | 1920-1930             | 10                               | 912                 | 2052.5                                            | 4.4 years          |
|          | White          | 1920-1932             | 12                               | 1402.5              | 2430                                              | 6.9 years          |
|          | Black          | 1920-1932             | 12                               | 1112                | 2430                                              | 5.5 years          |
| Maryland | White          | 1920-1928             | 8                                | 1361.5              | 1676                                              | 6.5 years          |
|          | Black          | 1920-1928             | 8                                | 1095.5              | 1676                                              | 5.2 years          |
|          | White          | 1920-1930             | 10                               | 1684.5              | 2052.5                                            | 8.2 years          |
|          | Black          | 1920-1930             | 10                               | 1373.5              | 2052.5                                            | 6.7 years          |
|          | White          | 1920-1932             | 12                               | 2013                | 2430                                              | 9.9 years          |
|          | Black          | 1920-1932             | 12                               | 1664                | 2430                                              | 8.2 years          |

*Notes:*

$\Sigma z_t$  does not vary between White and Black segregated schools because it is the value of the total days of school attendance using the maximum term length in any state or school system each year.

**Supplemental Figure 1.** Length of school term White-segregated schools (A) and Black-segregated schools (B) in the U.S. South by state (n=17) by Census Division, Biennial Survey of Education, 1919/20 to 1953/54.

**(A) White Segregated Schools**

**East South Central Division**

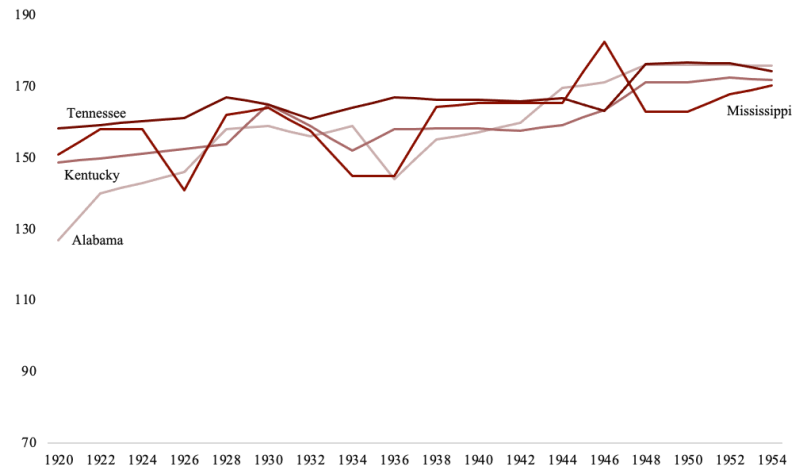

**(B) Black Segregated School**

**East South Central Division**

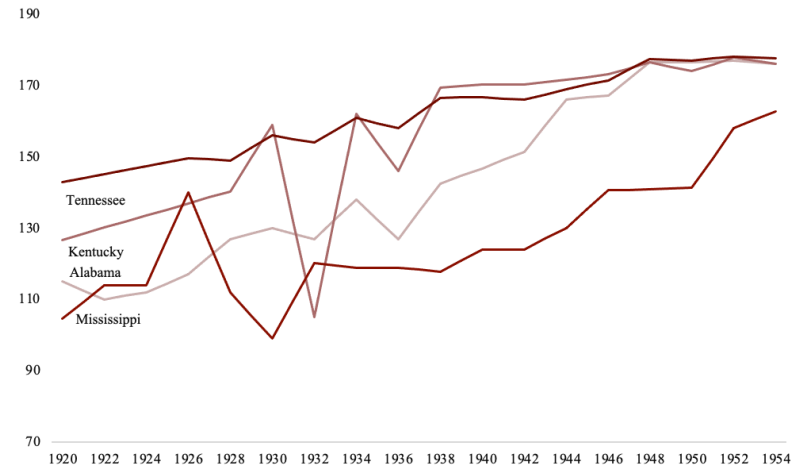

**South Atlantic**

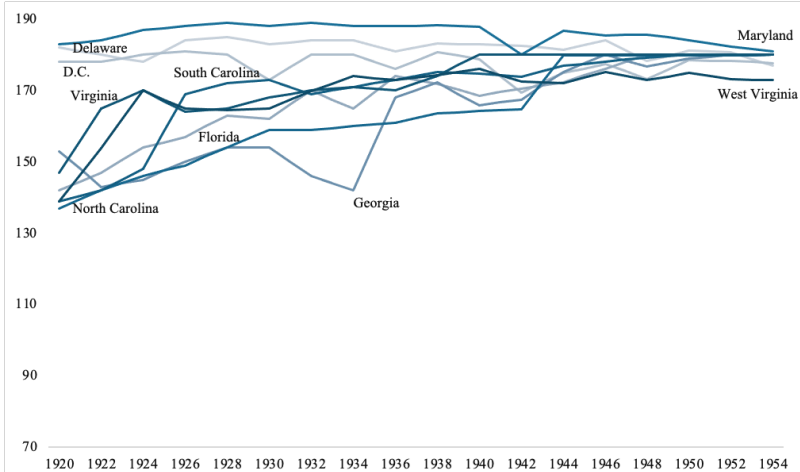

**South Atlantic**

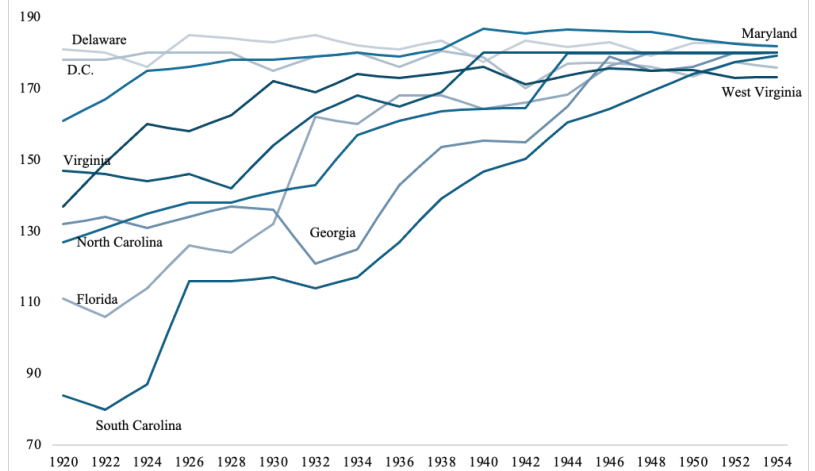

**(A) White Segregated Schools**

**West South Central**

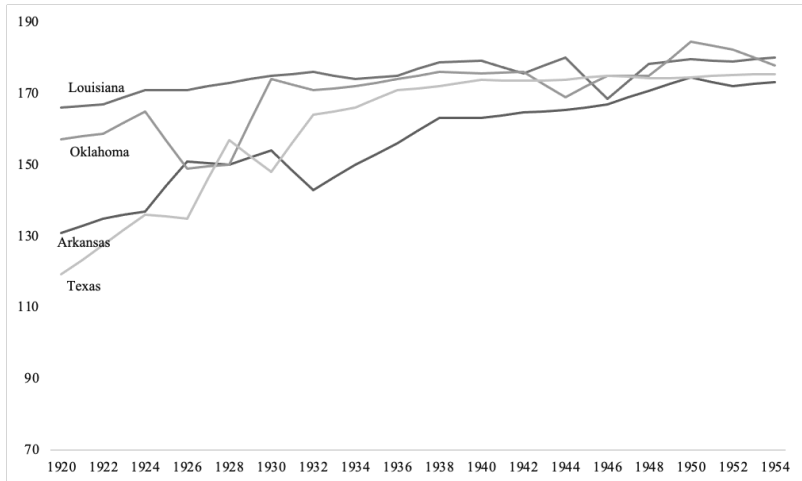

**(B) Black Segregated Schools**

**West South Central**

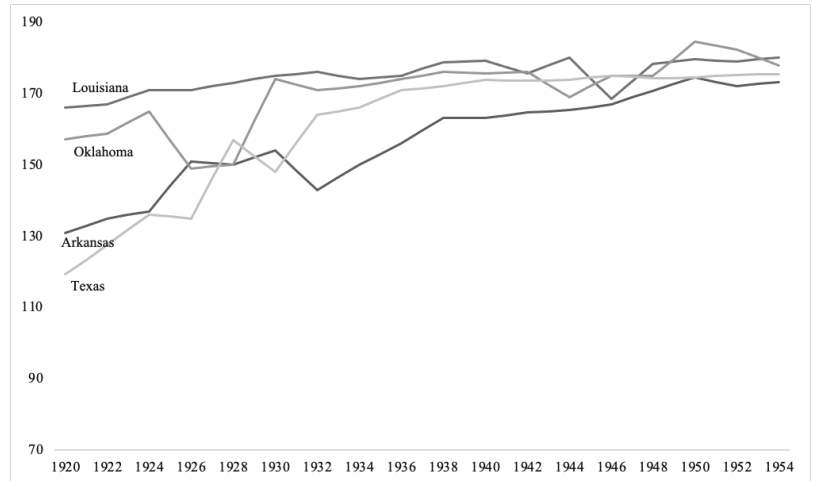

**Supplemental Figure 2.** Proportion of the maximum southern school term attended at White-segregated schools (A) and Black-segregated schools (B) in the U.S. South by state (n=17) by Census Division, Biennial Survey of Education, 1919/20 to 1953/54.

**(A) White Segregated Schools**

**East South Central Division**

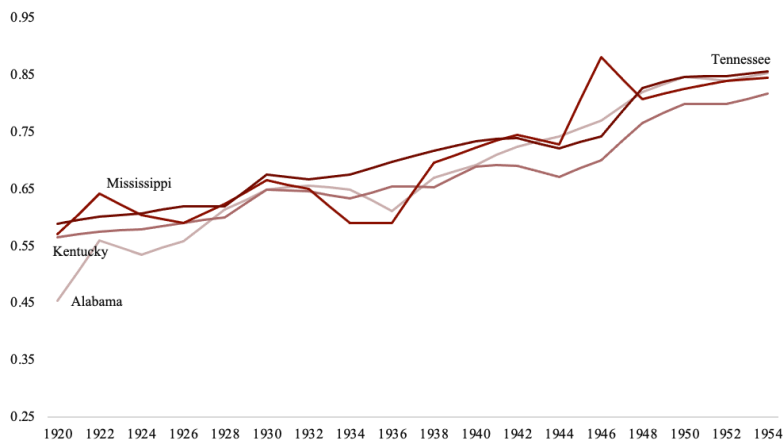

**(B) Black Segregated Schools**

**East South Central Division**

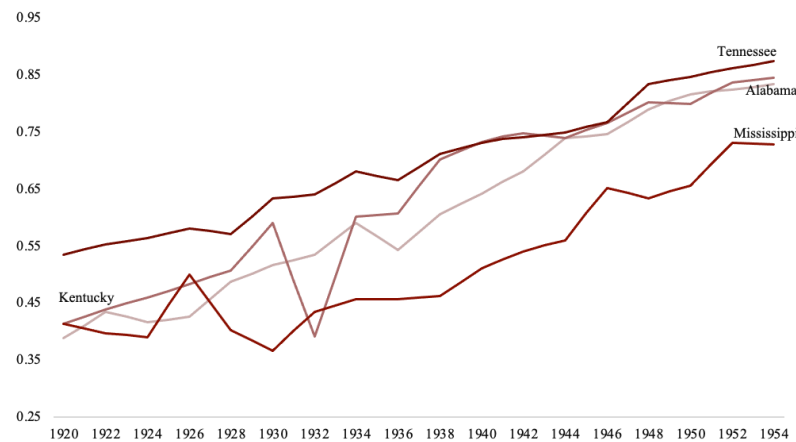

**South Atlantic**

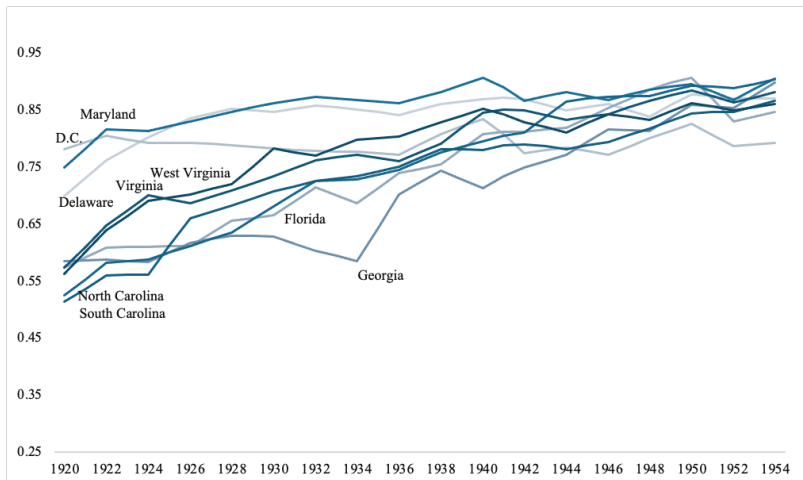

**South Atlantic**

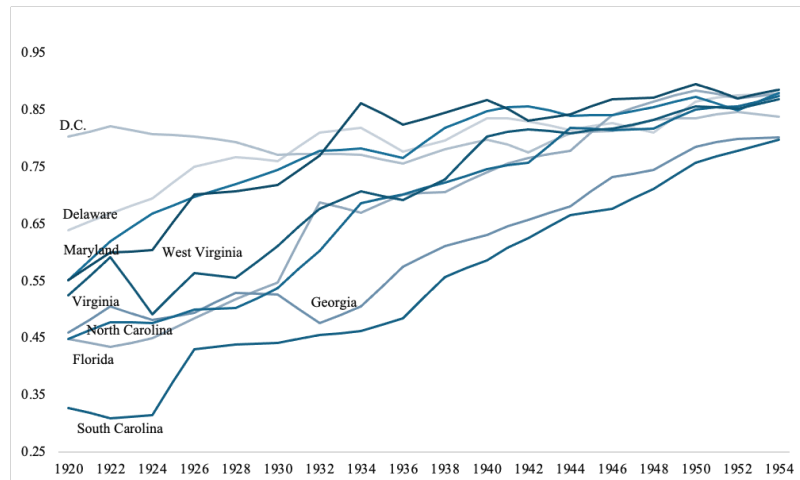

**(A) White Segregated Schools**

**West South Central Division**

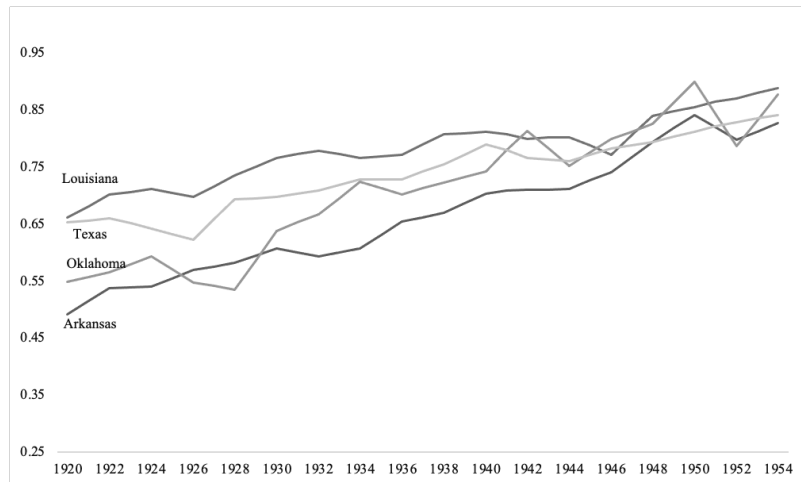

**(B) Black Segregated Schools**

**West South Central Division**

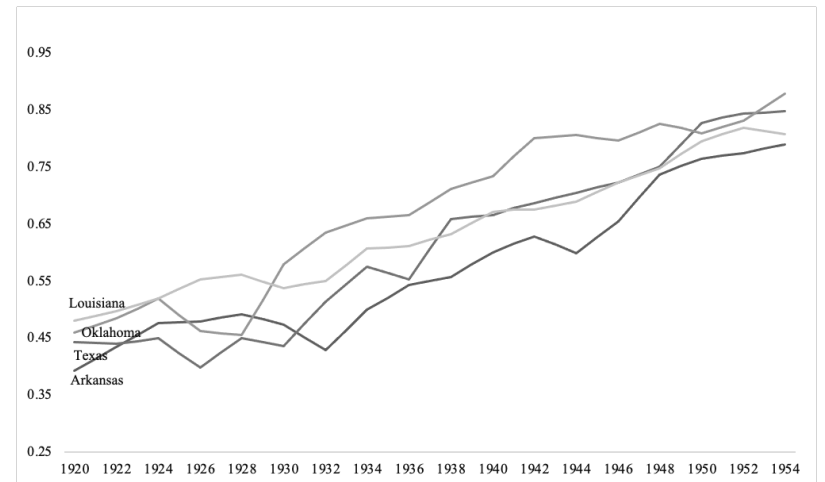

*Note.* Proportion of the school term attended is calculated as the average number of days attended as reported by the state divided by the maximum school term length in the U.S. South in that year. The average number of days attended is reported separately for White-segregated and Black-segregated schools.

**Supplemental Table S4: Comparing sample characteristics to assess differences between included vs excluded respondents.**  
Sample characteristics of Black and White HRS respondents who resided in U.S. South during school for those who provided a measure of cognitive function (n=4,343) versus those who did not (n=299)

|                                                     | Analytic Sample                    |                                    | Excluded due to Item Non-Response |                                  |
|-----------------------------------------------------|------------------------------------|------------------------------------|-----------------------------------|----------------------------------|
|                                                     | White<br>N=2,950<br>Mean (SE) or % | Black<br>N=1,393<br>Mean (SE) or % | White<br>N=186<br>Mean (SE) or %  | Black<br>N=113<br>Mean (SE) or % |
| <b>Women</b> <sup>a, b</sup>                        | 57.3%                              | 59.1%                              | 26.7%                             | 40.4%                            |
| <b>Schooling Cohort</b> <sup>b</sup>                |                                    |                                    |                                   |                                  |
| ≤ 1939                                              | 33.2%                              | 36.8%                              | 34.3%                             | 58.3%                            |
| 1940 - 1948                                         | 36.9%                              | 34.8%                              | 34.5%                             | 23.5%                            |
| 1949 - 1954                                         | 29.9%                              | 28.4%                              | 31.1%                             | 18.2%                            |
| <b>Census Division</b>                              |                                    |                                    |                                   |                                  |
| South Atlantic                                      | 43.3%                              | 52.7%                              | 44.2%                             | 53.5%                            |
| East South Central                                  | 25.5%                              | 24.2%                              | 28.7%                             | 20.4%                            |
| West South Central                                  | 31.2%                              | 23.1%                              | 27.1%                             | 26.1%                            |
| <b>Parent's Schooling ≥ 8 years</b> <sup>a, b</sup> | 61.1%                              | 41.3%                              | 41.7%                             | 30.3%                            |
| <b>Years of Schooling</b>                           |                                    |                                    |                                   |                                  |
| Self-reported <sup>a</sup>                          | 10.5 (0.05)                        | 8.8 (0.10)                         | 9.5 (0.24)                        | 8.1 (0.38)                       |
| Duration in school <sup>a, b</sup>                  | 7.9 (0.04)                         | 5.8 (0.08)                         | 7.1 (0.19)                        | 4.9 (0.27)                       |
| <b>Degree Attainment</b> <sup>a</sup>               |                                    |                                    |                                   |                                  |
| No degree                                           | 35.6%                              | 65.3%                              | 47.6%                             | 66.0%                            |
| GED                                                 | 5.6%                               | 3.8%                               | 7.4%                              | 5.0%                             |
| High school diploma                                 | 41.7%                              | 23.6%                              | 36.9%                             | 24.5%                            |
| Some college                                        | 17.1%                              | 7.2%                               | 8.1%                              | 4.4%                             |

*Notes*

<sup>a</sup> p<0.05 comparing those who provided a measure of cognitive function to those who did not, White respondents.

<sup>b</sup> p<0.05 comparing those who provided a measure of cognitive function to those who did not, Black respondents.



**Supplemental Table S5: Results from logistic regression models predicting item non-response on cognitive function regressed on time invariant characteristics stratified by respondent race.** Sample includes Black and White HRS respondents who resided in U.S. South during school and provided a measure of cognitive function (n=4,343) compared to those who did not (n=299)

|                                     | White<br>n=3,136     |                      | Black<br>n=1,506     |                      |
|-------------------------------------|----------------------|----------------------|----------------------|----------------------|
|                                     | Model 1              | Model 2              | Model 1              | Model 2              |
|                                     | OR<br>(95% CI)       | OR<br>(95% CI)       | OR<br>(95% CI)       | OR<br>(95% CI)       |
| <b>Women</b>                        | 0.26*<br>(0.18,0.37) | 0.26*<br>(0.18,0.37) | 0.47*<br>(0.30,0.72) | 0.48*<br>(0.31,0.74) |
| <b>Schooling Cohort</b>             |                      |                      |                      |                      |
| 1940 - 1948                         | 1.06<br>(0.70,1.60)  | 1.16<br>(0.76,1.78)  | 0.44*<br>(0.25,0.77) | 0.50*<br>(0.27,0.94) |
| 1949 - 1954                         | 1.21<br>(0.79,1.87)  | 1.44<br>(0.91,2.29)  | 0.41*<br>(0.23,0.73) | 0.51<br>(0.25,1.06)  |
| <b>Parent's Schooling ≥ 8 years</b> | 0.50*<br>(0.35,0.73) | 0.51*<br>(0.35,0.73) | 0.65<br>(0.40,1.04)  | 0.66<br>(0.41,1.06)  |
| <b>Years of Schooling</b>           |                      |                      |                      |                      |
| Self-reported                       | 0.91*<br>(0.83,0.99) |                      | 0.99<br>(0.90,1.08)  |                      |
| Duration in school                  |                      | 0.87*<br>(0.78,0.98) |                      | 0.92<br>(0.79,1.08)  |
| <b>Degree Attainment</b>            |                      |                      |                      |                      |
| No degree                           | 0.72<br>(0.42,1.24)  | 0.71<br>(0.42,1.22)  | 0.56<br>(0.29,1.11)  | 0.48*<br>(0.24,0.98) |
| GED                                 | 0.86<br>(0.41,1.78)  | 0.86<br>(0.41,1.78)  | 1.07<br>(0.37,3.07)  | 0.99<br>(0.34,2.91)  |
| Some college                        | 0.47*<br>(0.25,0.88) | 0.47*<br>(0.25,0.87) | 0.74<br>(0.28,1.93)  | 0.75<br>(0.29,1.95)  |
| Intercept                           | 0.60<br>(0.18,2.03)  | 0.56<br>(0.19,1.70)  | 0.36<br>(0.12,1.08)  | 0.47<br>(0.16,1.37)  |

\*  $p < 0.05$

**Supplemental Table S6: Comparing sample characteristics to assess representativeness of analytic sample versus full sample.** Sample characteristics of Black and White HRS respondents who resided in U.S. South during school for those who provided a measure of cognitive function (4,343) and for the full sample who also include those excluded due to item non-response on cognitive function (n=4,642).

|                                     | Analytic Sample (4,343) |                         | Full Sample (4,642)     |                         |
|-------------------------------------|-------------------------|-------------------------|-------------------------|-------------------------|
|                                     | White<br>Mean (SE) or % | Black<br>Mean (SE) or % | White<br>Mean (SE) or % | Black<br>Mean (SE) or % |
| <b>Women</b>                        | 57.3%                   | 59.1%                   | 55.6%                   | 57.8%                   |
| <b>Schooling Cohort</b>             |                         |                         |                         |                         |
| ≤ 1939                              | 33.2%                   | 36.8%                   | 33.3%                   | 38.3%                   |
| 1940 - 1948                         | 36.9%                   | 34.8%                   | 36.8%                   | 34.0%                   |
| 1949 - 1954                         | 29.9%                   | 28.4%                   | 29.9%                   | 27.7%                   |
| <b>Census Division</b>              |                         |                         |                         |                         |
| South Atlantic                      | 43.3%                   | 52.7%                   | 43.4%                   | 52.7%                   |
| East South Central                  | 25.5%                   | 24.2%                   | 25.7%                   | 23.9%                   |
| West South Central                  | 31.2%                   | 23.1%                   | 31.0%                   | 23.3%                   |
| <b>Parent's Schooling ≥ 8 years</b> | 61.1%                   | 41.3%                   | 60.0%                   | 40.5%                   |
| <b>Years of Schooling</b>           |                         |                         |                         |                         |
| Self-reported                       | 10.5 (0.05)             | 8.8 (0.10)              | 10.5 (0.05)             | 8.7 (0.10)              |
| Duration in school                  | 7.9 (0.04)              | 5.8 (0.08)              | 7.9 (0.04)              | 5.7 (0.08)              |
| <b>Degree Attainment</b>            |                         |                         |                         |                         |
| No degree                           | 35.6%                   | 65.3%                   | 36.2%                   | 65.4%                   |
| GED                                 | 5.6%                    | 3.8%                    | 5.7%                    | 3.9%                    |
| High school diploma                 | 41.7%                   | 23.6%                   | 41.5%                   | 23.7%                   |
| Some college                        | 17.1%                   | 7.2%                    | 16.6%                   | 7.0%                    |

*Notes:* There were no statistically significant differences between the full sample and the analytic sample on any of the model variables, suggesting that the analytic sample is representative of the full sample.

**Supplemental Table S7. Estimates from models to assess possible bias due to attrition.**

Estimates from linear mixed models predicting cognitive functioning, episodic memory, and working memory among Black and White older adults who resided in U.S. South during school and provided 3 or more observations, Health and Retirement Study (n=3,412)

|                              | <b>Model 1</b> |            | <b>Model 2</b> |            | <b>Model 3</b> |            |
|------------------------------|----------------|------------|----------------|------------|----------------|------------|
|                              | <b>At 73</b>   | <b>Age</b> | <b>At 73</b>   | <b>Age</b> | <b>At 73</b>   | <b>Age</b> |
| <b>Cognitive Functioning</b> |                |            |                |            |                |            |
| Black                        | -3.38*         | 0.10       | -2.30*         | 0.06       | -1.80*         | 0.07       |
|                              | (0.16)         | (0.12)     | (0.14)         | (0.12)     | (0.16)         | (0.13)     |
| Years of schooling           |                |            | 0.57*          | -0.07*     |                |            |
|                              |                |            | (0.04)         | (0.03)     |                |            |
| Duration in school           |                |            |                |            | 0.71*          | -0.03      |
|                              |                |            |                |            | (0.06)         | (0.05)     |
| Constant                     | 12.75*         | -1.33*     | 13.17*         | -1.69*     | 14.71*         | -1.77*     |
|                              | (0.28)         | (0.21)     | (0.25)         | (0.23)     | (0.25)         | (0.23)     |
| <b>Episodic Memory</b>       |                |            |                |            |                |            |
| Black                        | -1.78*         | 0.25*      | -1.18*         | 0.17       | -0.90*         | 0.17       |
|                              | (0.11)         | (0.09)     | (0.10)         | (0.09)     | (0.12)         | (0.10)     |
| Years of schooling           |                |            | 0.32*          | -0.06*     |                |            |
|                              |                |            | (0.03)         | (0.03)     |                |            |
| Duration in school           |                |            |                |            | 0.40*          | -0.04      |
|                              |                |            |                |            | (0.05)         | (0.04)     |
| Constant                     | 7.96*          | -1.19*     | 8.17*          | -1.48*     | 9.03*          | -1.58*     |
|                              | (0.20)         | (0.16)     | (0.19)         | (0.18)     | (0.19)         | (0.18)     |
| <b>Working Memory</b>        |                |            |                |            |                |            |
| Black                        | -1.59*         | -0.17*     | -1.12*         | -0.12*     | -0.91*         | -0.10*     |
|                              | (0.07)         | (0.05)     | (0.06)         | (0.05)     | (0.07)         | (0.05)     |
| Years of schooling           |                |            | 0.25*          | -0.01      |                |            |
|                              |                |            | (0.02)         | (0.01)     |                |            |
| Duration in school           |                |            |                |            | 0.31*          | 0.01       |
|                              |                |            |                |            | (0.02)         | (0.02)     |
| Constant                     | 4.83*          | -0.07      | 5.02*          | -0.19*     | 5.70*          | -0.17*     |
|                              | (0.12)         | (0.08)     | (0.11)         | (0.08)     | (0.11)         | (0.08)     |

Notes: To assess the extent to which estimates are affected by the inclusion of respondents who left the study after only one or two observations, we re-estimated our models after restricting our sample to those who provided at least 3 observations. Estimates are similar to those we report, indicating that our findings are likely not driven by issues of attrition.

\* $p < 0.05$

**Supplemental Table S8. Estimates from models to assess potential practice effects.**

Estimates from linear mixed models predicting cognitive functioning, episodic memory, and working memory among Black and White older adults who resided in U.S. South during school after dropping their first observation from analysis, Health and Retirement Study (n=3,891)

|                              | Model 1 |        | Model 2 |        | Model 3 |        |
|------------------------------|---------|--------|---------|--------|---------|--------|
|                              | At 73   | Age    | At 73   | Age    | At 73   | Age    |
| <b>Cognitive Functioning</b> |         |        |         |        |         |        |
| Black                        | -3.45*  | 0.16   | -2.38*  | 0.12   | -1.89*  | 0.12   |
|                              | (0.16)  | (0.13) | (0.14)  | (0.13) | (0.16)  | (0.14) |
| Years of schooling           |         |        | 0.57*   | -0.08* |         |        |
|                              |         |        | (0.04)  | (0.04) |         |        |
| Duration in school           |         |        |         |        | 0.71*   | -0.06  |
|                              |         |        |         |        | (0.06)  | (0.05) |
| Constant                     | 12.49*  | -1.33* | 13.09*  | -1.79* | 14.60*  | -1.92* |
|                              | (0.27)  | (0.23) | (0.25)  | (0.26) | (0.25)  | (0.26) |
| <b>Episodic Memory</b>       |         |        |         |        |         |        |
| Black                        | -1.83*  | 0.30*  | -1.23*  | 0.22*  | -0.94*  | 0.21   |
|                              | (0.11)  | (0.10) | (0.11)  | (0.10) | (0.12)  | (0.11) |
| Years of schooling           |         |        | 0.32*   | -0.07* |         |        |
|                              |         |        | (0.03)  | (0.03) |         |        |
| Duration in school           |         |        |         |        | 0.40*   | -0.05  |
|                              |         |        |         |        | (0.05)  | (0.04) |
| Constant                     | 7.77*   | -1.20* | 8.06*   | -1.56* | 8.91*   | -1.67* |
|                              | (0.19)  | (0.18) | (0.19)  | (0.20) | (0.19)  | (0.20) |
| <b>Working Memory</b>        |         |        |         |        |         |        |
| Black                        | -1.61*  | -0.15* | -1.16*  | -0.1   | -0.94*  | -0.08  |
|                              | (0.07)  | (0.05) | (0.06)  | (0.05) | (0.07)  | (0.05) |
| Years of schooling           |         |        | 0.25*   | -0.01  |         |        |
|                              |         |        | (0.02)  | (0.01) |         |        |
| Duration in school           |         |        |         |        | 0.31*   | 0      |
|                              |         |        |         |        | (0.02)  | (0.02) |
| Constant                     | 4.80*   | -0.06  | 5.06*   | -0.22* | 5.72*   | -0.22* |
|                              | (0.12)  | (0.09) | (0.11)  | (0.09) | (0.11)  | (0.09) |

Notes: To assess potential practice effects from using the TICS, we excluded respondents' first observation from the analysis and re-estimated the models given prior findings that practice effects, if they occur, tend to occur between the first and second observation (c.f., Alley et al., 2007; Beglinger et al., 2005; Hultsch et al., 2000). Estimates and inferences from these models are substantively the same and do not alter our inferences.

\* $p < 0.05$

**Supplemental Table S9. Estimates from models to test for moderated-mediation, Health and Retirement Study (n=4,343).<sup>a, b</sup>**

|                            | Model 1 |                  | Model 2 |        | Model 3 |        |
|----------------------------|---------|------------------|---------|--------|---------|--------|
|                            | At 73   | Age <sup>c</sup> | At 73   | Age    | At 73   | Age    |
| <b>Cognitive Function</b>  |         |                  |         |        |         |        |
| Black                      | -3.44*  | 0.11             | -2.55*  | -0.08  | -2.09*  | -0.16  |
|                            | (0.15)  | (0.11)           | (0.22)  | (0.20) | (0.29)  | (0.24) |
| Years of schooling         |         |                  | 0.55*   | -0.07  |         |        |
|                            |         |                  | (0.05)  | (0.04) |         |        |
| Black x Years of schooling |         |                  | -0.10   | -0.02  |         |        |
|                            |         |                  | (0.06)  | (0.05) |         |        |
| Duration in school         |         |                  |         |        | 0.60*   | -0.06  |
|                            |         |                  |         |        | (0.06)  | (0.05) |
| Black x Duration in school |         |                  |         |        | -0.01   | -0.02  |
|                            |         |                  |         |        | (0.07)  | (0.06) |
| Constant                   | 12.44*  | -1.27*           | 13.81*  | -1.71* | 15.29*  | -1.81* |
|                            | (0.26)  | (0.20)           | (0.23)  | (0.22) | (0.26)  | (0.24) |
| <b>Episodic Memory</b>     |         |                  |         |        |         |        |
| Black                      | -1.79*  | 0.26*            | -1.28*  | 0.10   | -0.97*  | 0.02   |
|                            | (0.10)  | (0.09)           | (0.16)  | (0.16) | (0.21)  | (0.20) |
| Years of schooling         |         |                  | 0.30*   | -0.06  |         |        |
|                            |         |                  | (0.03)  | (0.03) |         |        |
| Black x Years of schooling |         |                  | -0.05   | -0.01  |         |        |
|                            |         |                  | (0.04)  | (0.04) |         |        |
| Duration in school         |         |                  |         |        | 0.33*   | -0.05  |
|                            |         |                  |         |        | (0.04)  | (0.04) |
| Black x Duration in school |         |                  |         |        | 0.01    | -0.02  |
|                            |         |                  |         |        | (0.05)  | (0.05) |
| Constant                   | 7.75*   | -1.16*           | 8.46*   | -1.52* | 9.28*   | -1.62* |
|                            | (0.18)  | (0.16)           | (0.18)  | (0.17) | (0.20)  | (0.19) |
| <b>Working Memory</b>      |         |                  |         |        |         |        |
| Black                      | -1.64*  | -0.16*           | -1.27*  | -0.17* | -1.12*  | -0.16  |
|                            | (0.07)  | (0.05)           | (0.10)  | (0.09) | (0.14)  | (0.10) |
| Years of schooling         |         |                  | 0.24*   | -0.01  |         |        |
|                            |         |                  | (0.02)  | (0.02) |         |        |
| Black x Years of schooling |         |                  | -0.04   | -0.01  |         |        |
|                            |         |                  | (0.03)  | (0.02) |         |        |
| Duration in school         |         |                  |         |        | 0.27*   | -0.01  |
|                            |         |                  |         |        | (0.02)  | (0.02) |
| Black x Duration in school |         |                  |         |        | -0.02   | 0.01   |
|                            |         |                  |         |        | (0.03)  | (0.02) |
| Constant                   | 4.76*   | -0.04            | 5.39*   | -0.17* | 6.04*   | -0.17  |
|                            | (0.11)  | (0.08)           | (0.10)  | (0.08) | (0.11)  | (0.09) |

<sup>a</sup> All models adjust for gender, education cohort, state of childhood residence (dummies), parental education, and mode of interview. Models 2 and 3 adjust for degree attainment. <sup>b</sup> Number of person-period observations = 25,737. Mean number of observations = 5.9. <sup>c</sup> Age is divided 10

*Notes:* To determine if moderated-mediation was occurring, we re-estimated our models after including interactions between race and education (years of schooling, duration in school, degree attainment). We do not find support for moderated-mediation across cognitive domains or education measures in these models. None of the race x education interactions were statistically significant and all coefficients were close to zero.

## References

- Alley, D., Suthers, K., & Crimmins, E. (2007). Education and Cognitive Decline in Older Americans: Results from the AHEAD sample. *Research on Aging, 29*(1), 73–97.
- Beglinger, L. J., Gaydos, B., Tangphao-Daniels, O., Duff, K., Kareken, D. A., Crawford, J., Fastenau, P. S., & Siemers, E. R. (2005). Practice effects and the use of alternate forms in serial neuropsychological testing. *Archives of Clinical Neuropsychology, 20*(4), 517–529. <https://doi.org/10.1016/j.acn.2004.12.003>
- Hultsch, D. F., MacDonald, S. W., Hunter, M. A., Levy-Bencheton, J., & Strauss, E. (2000). Intraindividual variability in cognitive performance in older adults: Comparison of adults with mild dementia, adults with arthritis, and healthy adults. *Neuropsychology, 14*(4), 588.
